# Supplementary material
Source: MDPI journal article supplement (https://www.mdpi.com/2227-9717/8/10/1204)
Supplement: s1 [file s1]

# **Solubilization, Hansen Solubility Parameters, Solution Thermodynamics and Solvation Behavior of Flufenamic acid in (Carbitol + Water) Mixtures**

**Faiyaz Shakeel, and Sultan Alshehri\***

Department of Pharmaceutics, College of Pharmacy, King Saud University, Riyadh 11451, Saudi Arabia

**\*Corresponding Author:**

Dr. Sultan Alshehri

Department of Pharmaceutics, College of Pharmacy,

King Saud University, Riyadh, Saudi Arabia

Email: salshehri1@ksu.edu.sa

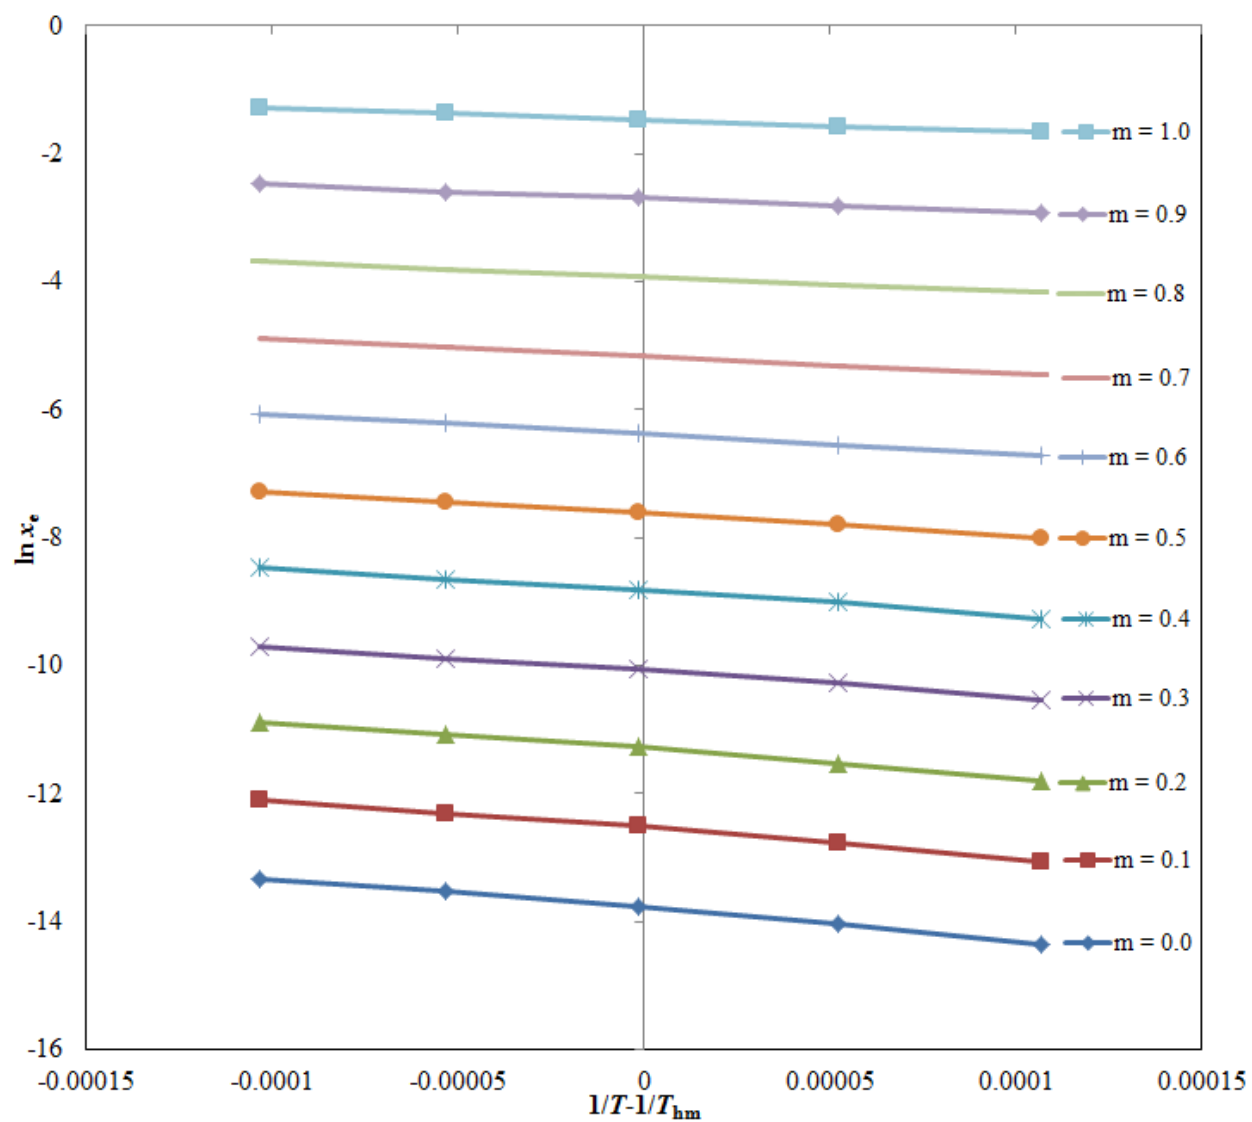

**Figure S1.** Van't Hoff plots for flufenamic acid (FFA) between  $\ln x_e$  and  $1/T - 1/T_{hm}$  in various "Carbitol + water" mixtures.

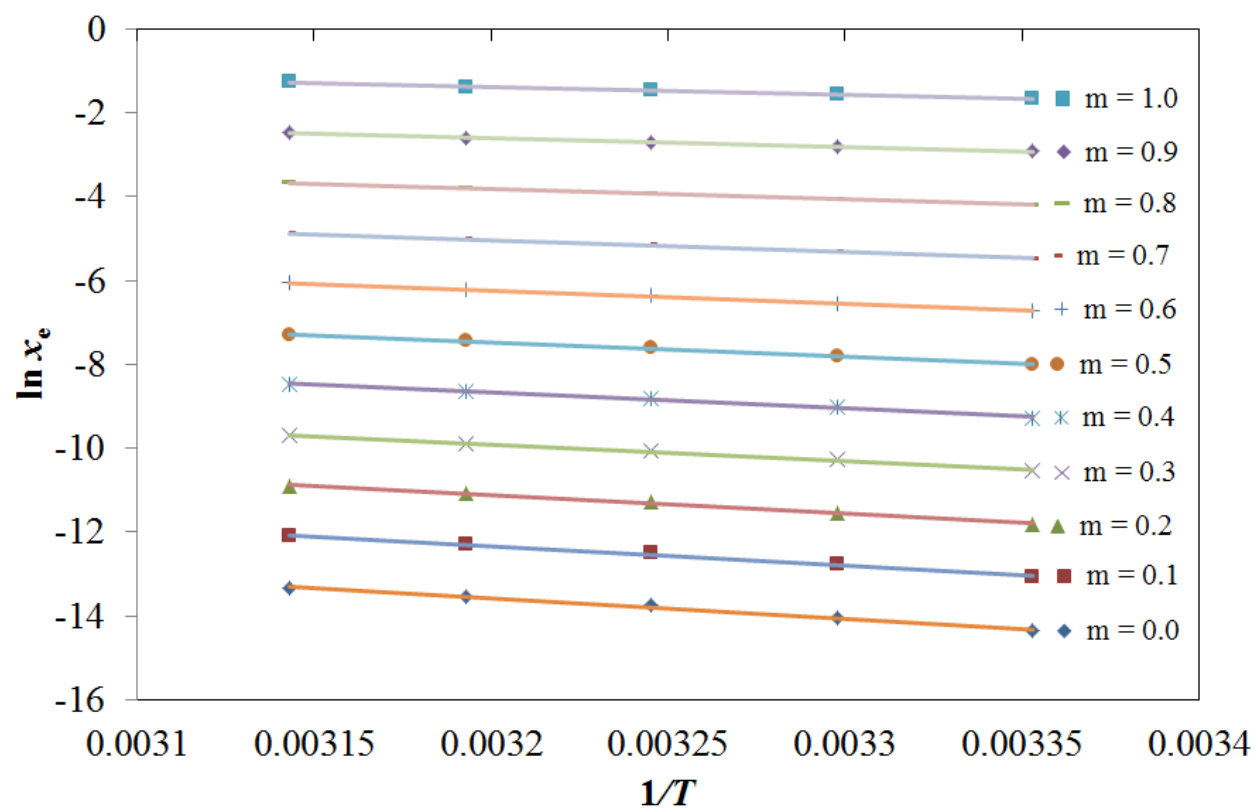

**Figure S2.** Graphical correlation of FFA solubility with “Van’t Hoff model” in various “Carbitol + water” mixtures at “ $T = 298.2\text{--}318.2\text{ K}$ ” (Van’t Hoff solubility of FFA is represented by solid lines and experimental solubility of FFA is represented by the symbols).

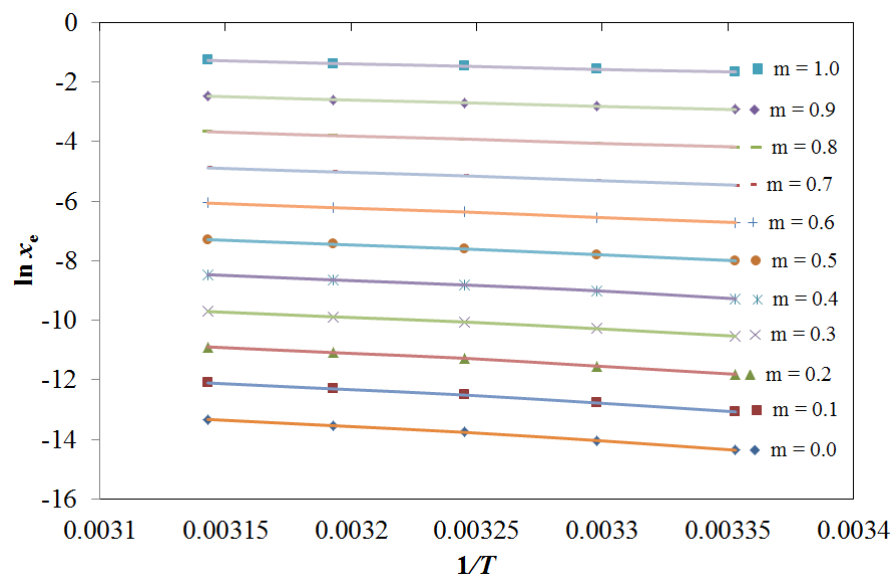

**Figure S3.** Graphical correlation of FFA solubility with “Apelblat model” in various “Carbitol + water” mixtures at “ $T = 298.2\text{--}318.2\text{ K}$ ” (Apelblat solubility of FFA is represented by solid lines and experimental solubility of FFA is represented by the symbols).
